# Supplementary material for: Examining clustered somatic mutations with SigProfilerClusters
Source: PubMed Central journal article supplement (PMC9237733; doi:10.1093/bioinformatics/btac335), 2022-05-20

Supplementary Figure 1. Benchmarking of existing tools that detect clustered mutations

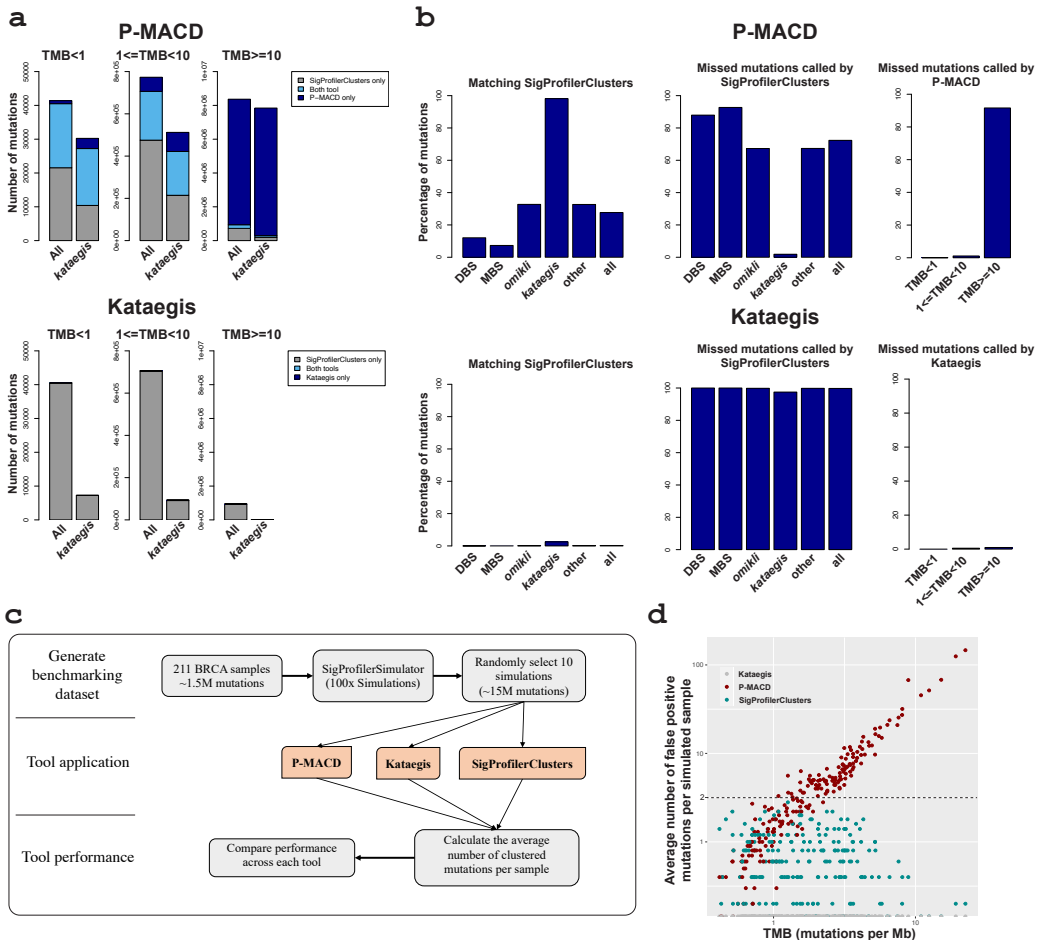

Supplement: btac335_supplementary_data.pdf [file btac335_supplementary_data.pdf]
